# Supplementary material for: Lorentz microscopy sheds light on the role of dipolar interactions in magnetic hyperthermia
Source: Royal Society of Chemistry journal article supplement (doi:10.1039/c5nr00273g), 2015-01-01
Supplement: c5nr00273g1.pdf [file c5nr00273g1.pdf]

## ***Lorentz microscopy sheds light on the role of dipolar interactions in magnetic hyperthermia***

M. Campanini<sup>a\*</sup>, R. Ciprian<sup>a</sup>, E. Bedogni<sup>b</sup>, A. Mega<sup>b</sup>, V. Chiesi<sup>a</sup>, F. Casoli<sup>a</sup>, C. de Julián Fernández<sup>a</sup>, E. Rotunno<sup>a</sup>, F. Rossi<sup>a</sup>, A. Secchi<sup>b</sup>, F. Bigi<sup>b</sup>, G. Salvati<sup>a</sup>, C. Magén<sup>c</sup>, V. Grillo<sup>a</sup> and F. Albertini<sup>a</sup>

<sup>a</sup> Istituto Materiali per l'Elettronica ed il Magnetismo IMEM-CNR, Parco Area delle Scienze 37/A, 43124 Parma, Italy. Fax: +39 0521269206; Tel: +39 0521269250; email: marco.campanini@imem.cnr.it.

<sup>b</sup> Dipartimento di Chimica, Università di Parma, Parco Area delle Scienze 17/A, 43124 Parma, Italy.

<sup>c</sup> Instituto de Nanociencia de Aragón, Campus Río Ebro, Calle Mariano Esquillor, 50018 Zaragoza, Spain

\*email: marco.campanini@imem.cnr.it

Phone: +39 0521 269212 Fax: +39 0521 269206

### **Supplementary Information**

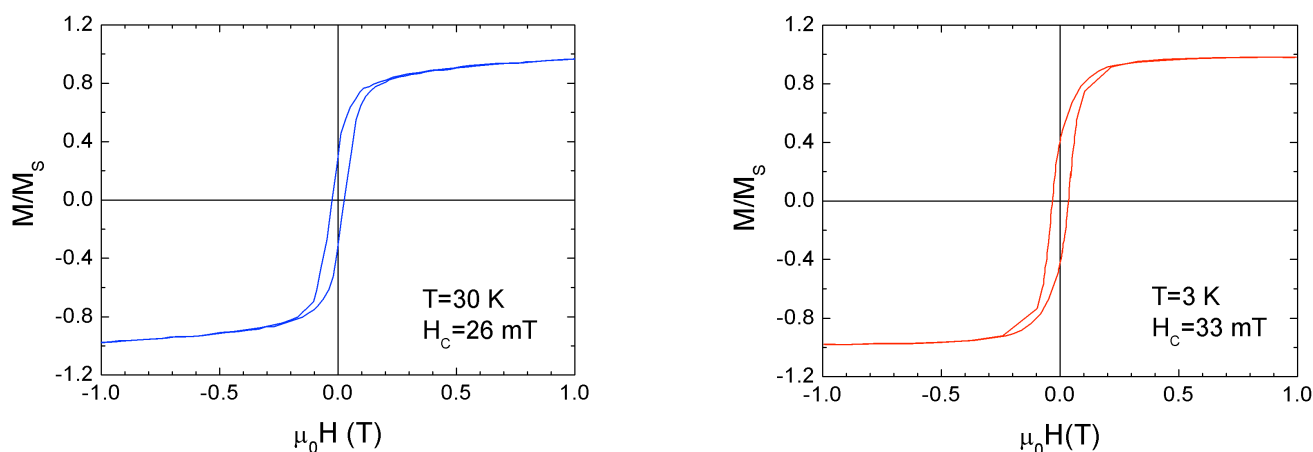

**Figure SI.1**

Hysteresis loops measured at low temperature (i.e., in the blocked state) on CO-NPs (left panel) and TD-NPs (right panel) samples, which do not evidence a substantial difference in magnetic anisotropy between the two samples. Coercive field values are 26 mT for CO-NPs at 30 K and 33 mT for TD-NPs at 3 K.

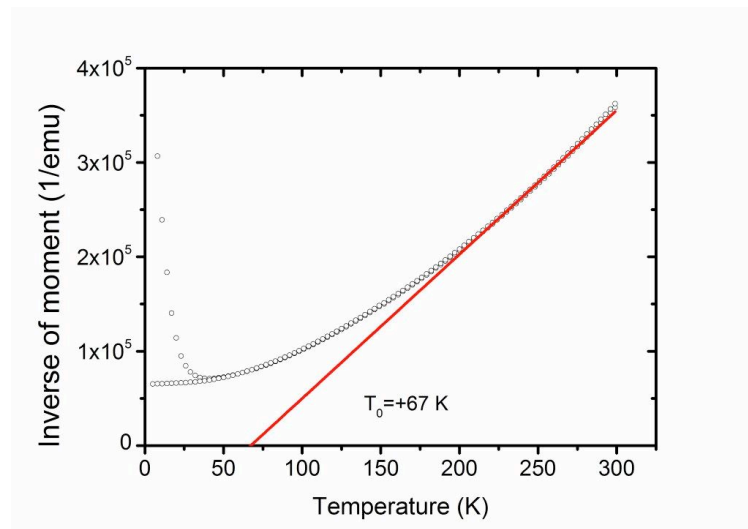

**Figure SI.2**

Inverse of magnetic moment as a function of temperature for TD-NPs sample, showing that inter-particle interactions in the TD-NPs sample are lower than in the CO-NPs sample, but not negligible. The ZFC and FC curves of this sample show in fact a Curie-Weiss temperature dependence  $M = A(T - T_0)$  in the temperature region from 200 to 300 K, i.e., well above the blocking temperature. A  $T_0$  value of +67 K was deduced, indicating that inter-particle interactions favour magnetic ordering.

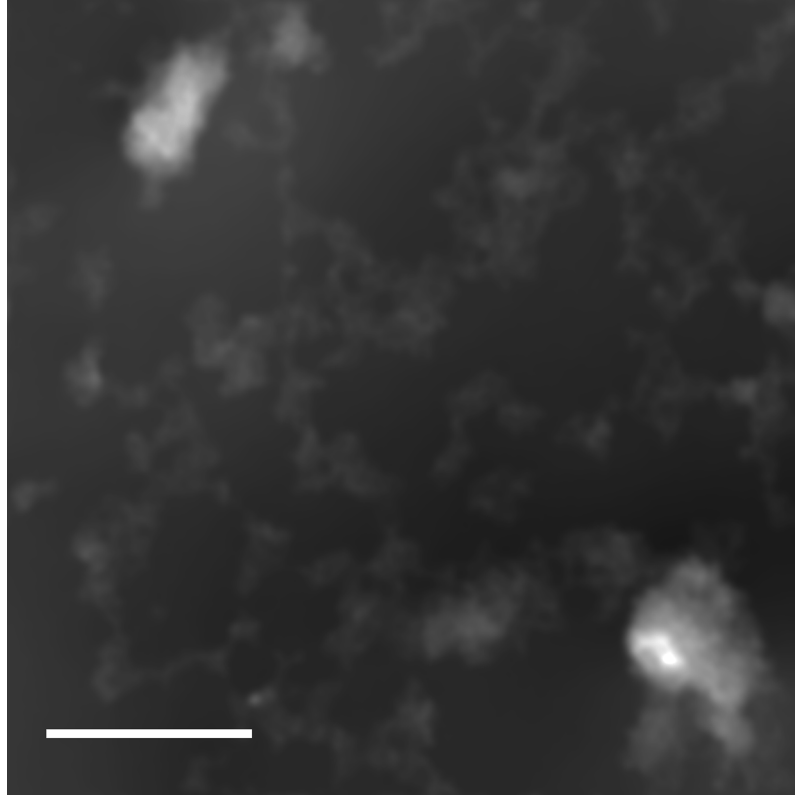

**Figure SI.3**

Mean inner potential (MIP) contribution as obtained by Lorentz microscopy investigation for the CO-NPs sample. The image is relative to the same area of the sample shown in Fig. 5; the image scale bar is 0.5  $\mu\text{m}$ .
